# Supplementary material for: Glutathione-sensitive and folate-targeted nanoparticles loaded with paclitaxel to enhance oral squamous cell carcinoma therapy
Source: Royal Society of Chemistry journal article supplement (doi:10.1039/c9tb02818h), 2020-01-01
Supplement: c9tb02818h1.pdf [file c9tb02818h1.pdf]

The R squared and fitted curves were showed in supporting information.

PTX:

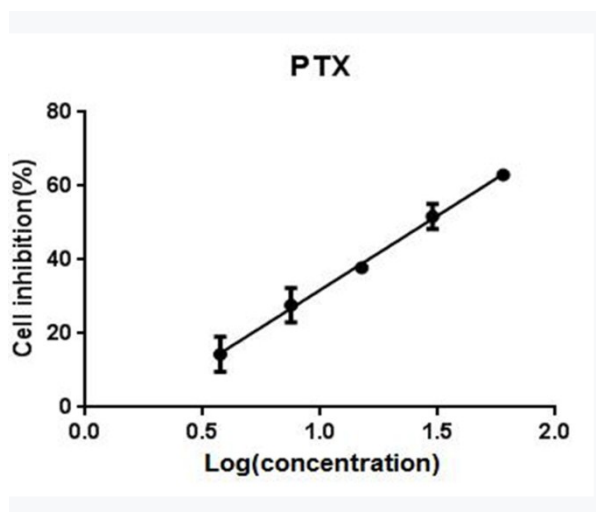

| Linear reg. |                                  | A                   |
|-------------|----------------------------------|---------------------|
|             |                                  | Data Set-A          |
| #           |                                  | Y                   |
| 1           | Best-fit values                  |                     |
| 2           | Slope                            | 40.34 ± 0.9692      |
| 3           | Y-intercept when X=0.0           | -8.494 ± 1.212      |
| 4           | X-intercept when Y=0.0           | 0.2106              |
| 5           | 1/slope                          | 0.02479             |
| 6           | 95% Confidence Intervals         |                     |
| 7           | Slope                            | 37.26 to 43.42      |
| 8           | Y-intercept when X=0.0           | -12.35 to -4.637    |
| 9           | X-intercept when Y=0.0           | 0.1238 to 0.2860    |
| 10          | Goodness of Fit                  |                     |
| 11          | R square                         | 0.9983              |
| 12          | Syxx                             | 0.9996              |
| 13          | Is slope significantly non-zero? |                     |
| 14          | F                                | 1733                |
| 15          | DFn, DFd                         | 1.000, 3.000        |
| 16          | P value                          | < 0.0001            |
| 17          | Deviation from zero?             | Significant         |
| 18          | Data                             |                     |
| 19          | Number of X values               | 5                   |
| 20          | Maximum number of Y replicates   | 1                   |
| 21          | Total number of values           | 5                   |
| 22          | Number of missing values         | 0                   |
| 23          |                                  |                     |
| 24          | Equation                         | Y = 40.34*X - 8.494 |

FA-NPs:

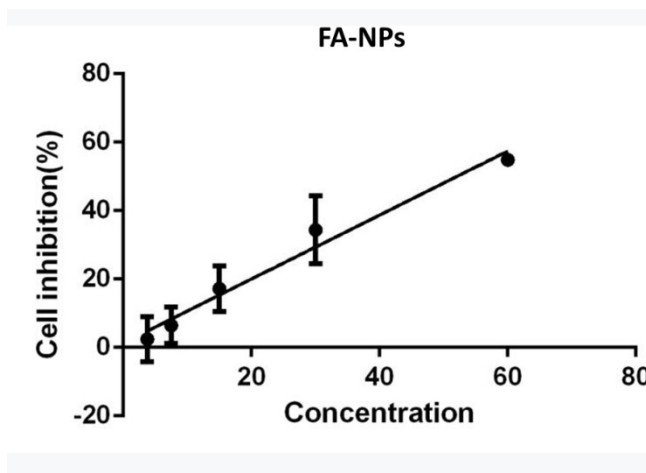

| Linear reg. |                                  | A                    |
|-------------|----------------------------------|----------------------|
|             |                                  | Data Set-A           |
| #           |                                  | Y                    |
| 1           | Best-fit values                  |                      |
| 2           | Slope                            | 0.9349 ± 0.08391     |
| 3           | Y-intercept when X=0.0           | 1.334 ± 2.599        |
| 4           | X-intercept when Y=0.0           | -1.426               |
| 5           | 1/slope                          | 1.070                |
| 6           | 95% Confidence Intervals         |                      |
| 7           | Slope                            | 0.6679 to 1.202      |
| 8           | Y-intercept when X=0.0           | -6.935 to 9.603      |
| 9           | X-intercept when Y=0.0           | -13.42 to 6.183      |
| 10          | Goodness of Fit                  |                      |
| 11          | R square                         | 0.9764               |
| 12          | Syxx                             | 0.998                |
| 13          | Is slope significantly non-zero? |                      |
| 14          | F                                | 124.1                |
| 15          | DFn, DFd                         | 1.000, 3.000         |
| 16          | P value                          | 0.0015               |
| 17          | Deviation from zero?             | Significant          |
| 18          | Data                             |                      |
| 19          | Number of X values               | 5                    |
| 20          | Maximum number of Y replicates   | 1                    |
| 21          | Total number of values           | 5                    |
| 22          | Number of missing values         | 0                    |
| 23          |                                  |                      |
| 24          | Equation                         | Y = 0.9349*X + 1.334 |
| 25          |                                  |                      |

NPs:

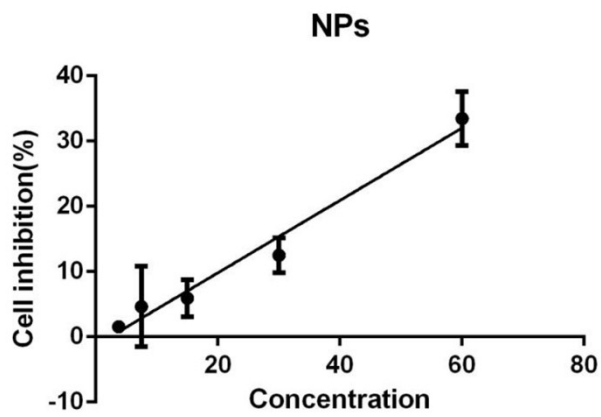

| Linear reg. |                                  | A                    |
|-------------|----------------------------------|----------------------|
|             |                                  | Data Set-A           |
|             |                                  | Y                    |
| 1           | Best-fit values                  |                      |
| 2           | Slope                            | 0.5550 ± 0.04920     |
| 3           | Y-intercept when X=0.0           | -1.272 ± 1.524       |
| 4           | X-intercept when Y=0.0           | 2.292                |
| 5           | 1/slope                          | 1.802                |
| 6           | 95% Confidence Intervals         |                      |
| 7           | Slope                            | 0.3985 to 0.7116     |
| 8           | Y-intercept when X=0.0           | -6.120 to 3.576      |
| 9           | X-intercept when Y=0.0           | -8.318 to 9.279      |
| 10          | Goodness of Fit                  |                      |
| 11          | R square                         | 0.9770               |
| 12          | $\hat{y}_x$                      | 2.251                |
| 13          | Is slope significantly non-zero? |                      |
| 14          | F                                | 127.3                |
| 15          | DFn, DFd                         | 1.000, 3.000         |
| 16          | P value                          | 0.0015               |
| 17          | Deviation from zero?             | Significant          |
| 18          | Data                             |                      |
| 19          | Number of X values               | 5                    |
| 20          | Maximum number of Y replicates   | 1                    |
| 21          | Total number of values           | 5                    |
| 22          | Number of missing values         | 0                    |
| 23          |                                  |                      |
| 24          | Equation                         | Y = 0.5550*X - 1.272 |
